# Supplementary material for: Cryo-EM structure determination of small therapeutic protein targets at 3 Å-resolution using a rigid imaging scaffold
Source: PubMed Central journal article supplement (PMC10500258; doi:10.1073/pnas.2305494120), 2023-09-05
Supplement: pnas.2305494120.sapp.pdf [file pnas.2305494120.sapp.pdf]

## Supplementary Material for

Castells-Graells, *et al.*

“Cryo-EM structure determination of small therapeutic protein targets at 3 Å resolution using a rigid imaging scaffold”

### Supplementary Figures:

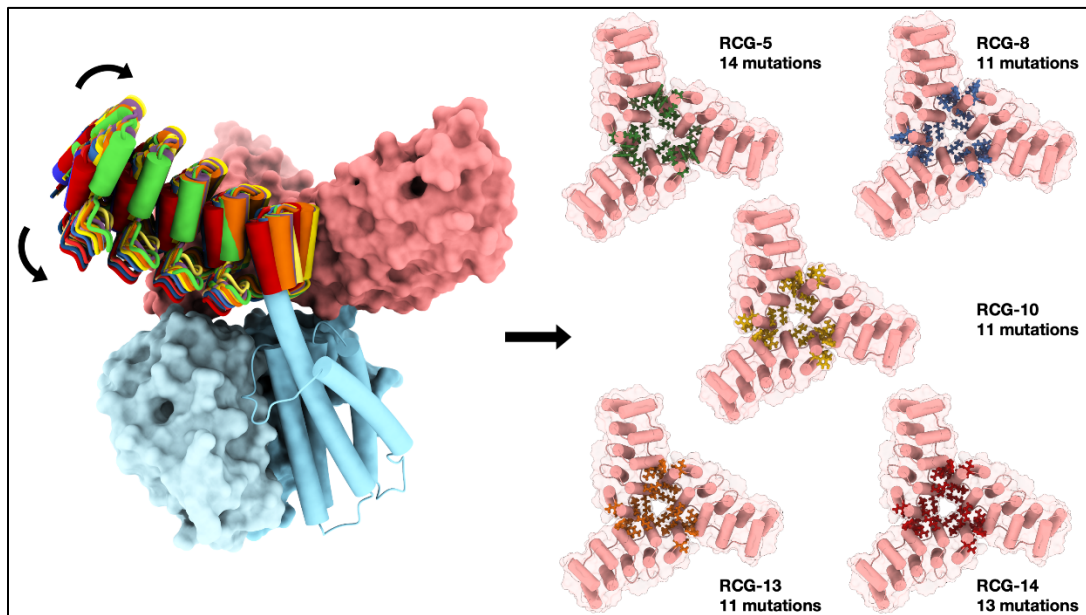

**Figure S1.** Rigidification of the designed scaffold by computational interface design between contacting DARPins. (left) Three protruding DARPins are shown fused to their protein cage subunits (blue) by a continuous alpha helical linker. A limited degree of natural flexibility (*i.e.* deviation from ideal helical parameters) was modeled in the alpha helix in order to generate distinct backbone models that sample slightly different modes of association in the new interface. One of the DARPins, subject to flexible modeling, is shown by multicolor models; the other two contacting DARPins are shown in salmon. Among top-scoring models from computational sequence design, five candidates (right) were found suitable for evaluation by cryo-EM. Mutated residues are shown in stick representation for each of the DARPins in a trimeric bundle.

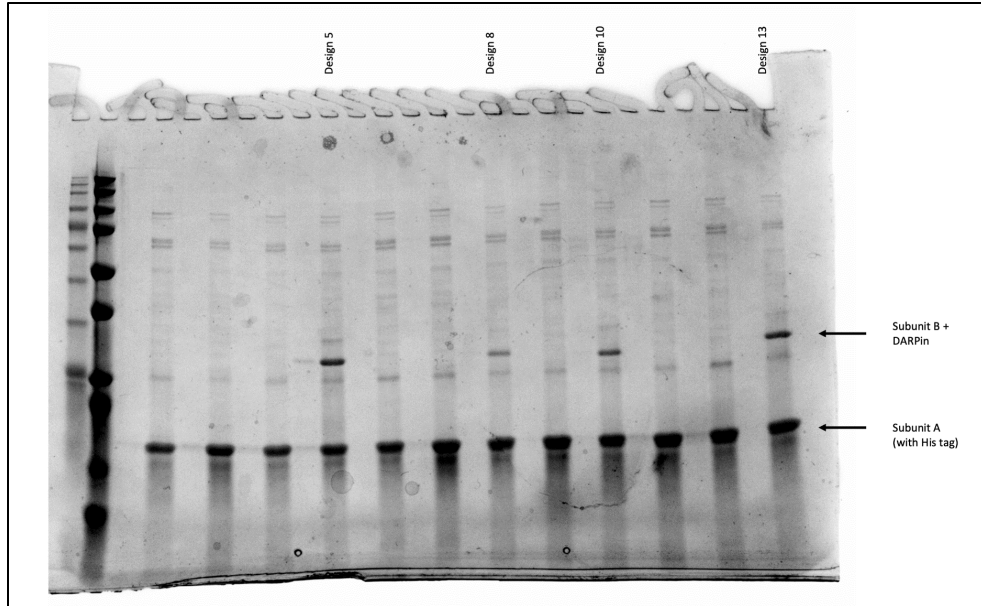

**Figure S2.** SDS PAGE gel showing co-elution of the two protein chains, A and B, comprising a scaffold. Subunit A (a component of the cage core) is His-tagged. Subunit B is a fusion between a cage core component and a DARPin that serves to bind diverse cargo proteins for imaging.

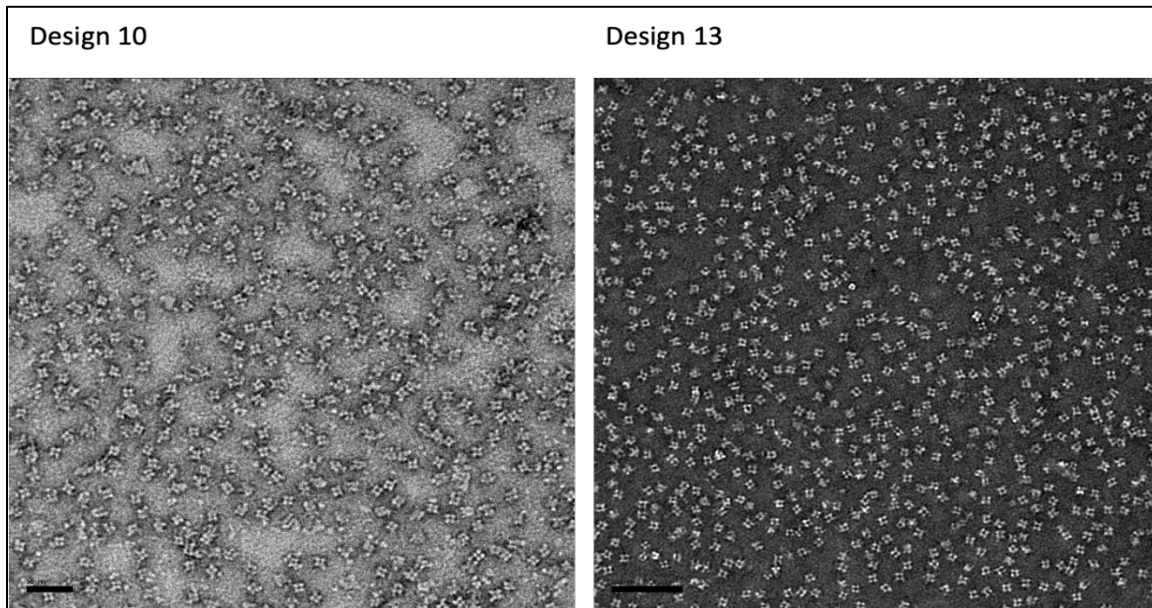

**Figure S3.** Negative stained electron micrographs of the rigidified imaging scaffold particles.

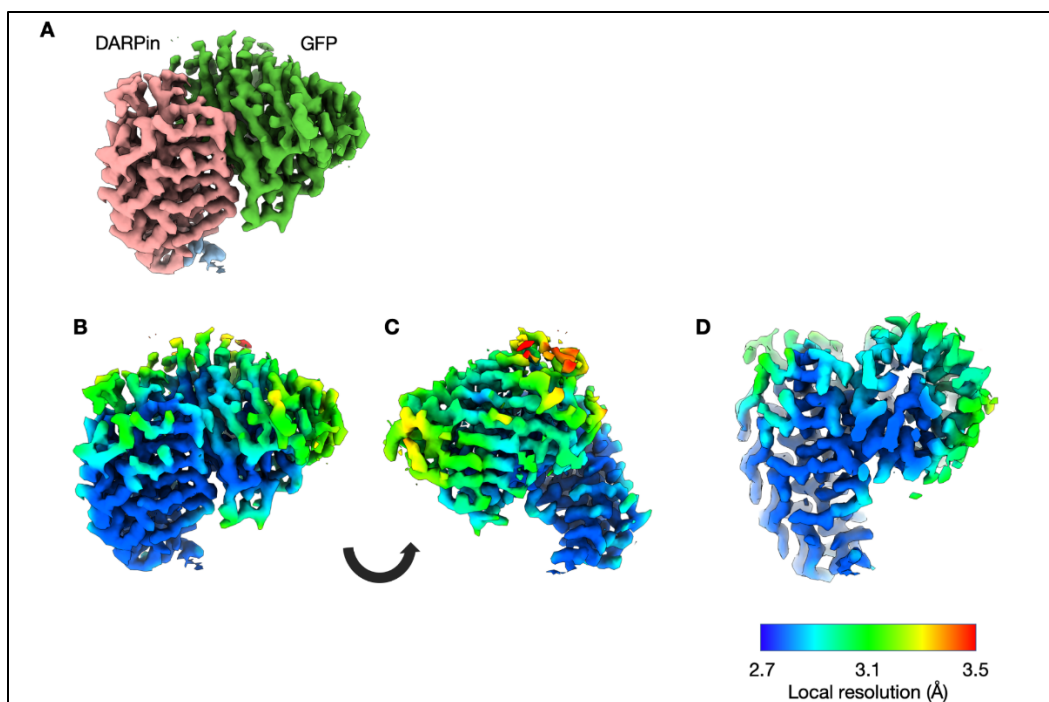

**Figure S4.** Local resolution for the focus-refined map of the GFP and DARPin. A. DARPin (salmon) and GFP (green). B and C, two rotated views of the map colored by local resolution. D, a cross section of the map.

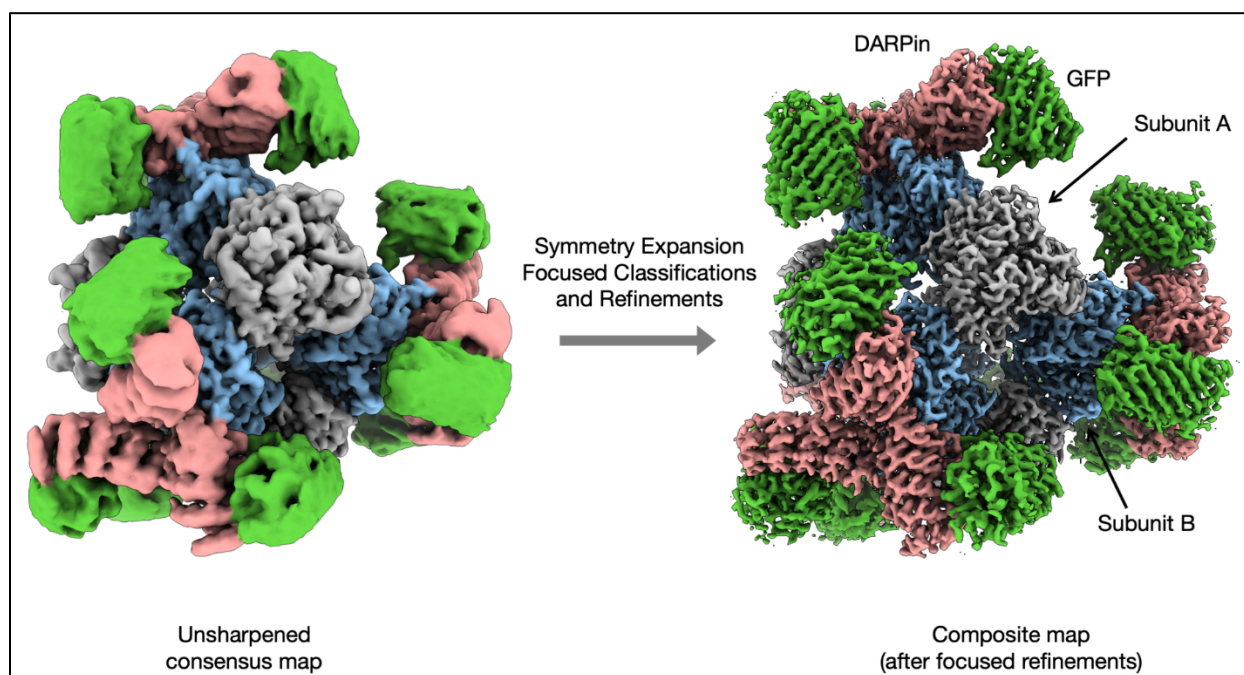

**Figure S5.** Cryo-EM densities for the imaging scaffold bound to GFP. The overall reconstruction (left) and a composite map of the focused refinements (right). After symmetry expansion (symmetry T), focused classifications and refinements were performed with a mask encompassing mainly one GFP (green) and one DARPin (salmon).

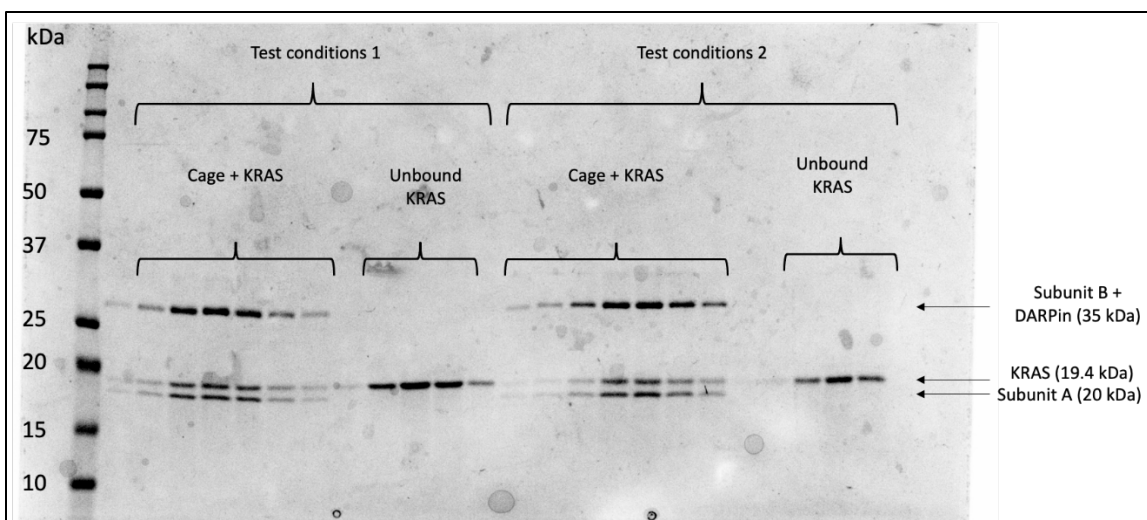

**Figure S6.** Binding assay of KRAS G13C to rigidified imaging scaffolds. The early SEC fractions show co-elution of the cage components with the KRAS (bound). The later fractions correspond to unbound KRAS. The higher band (~35 kDa) corresponds to the cage subunit B fused to the DARPin, the middle band corresponds to the KRAS protein (19.4 kDa) and the lower band is the cage subunit A (20kDa). Cage subunit A runs slightly smaller than its known size.

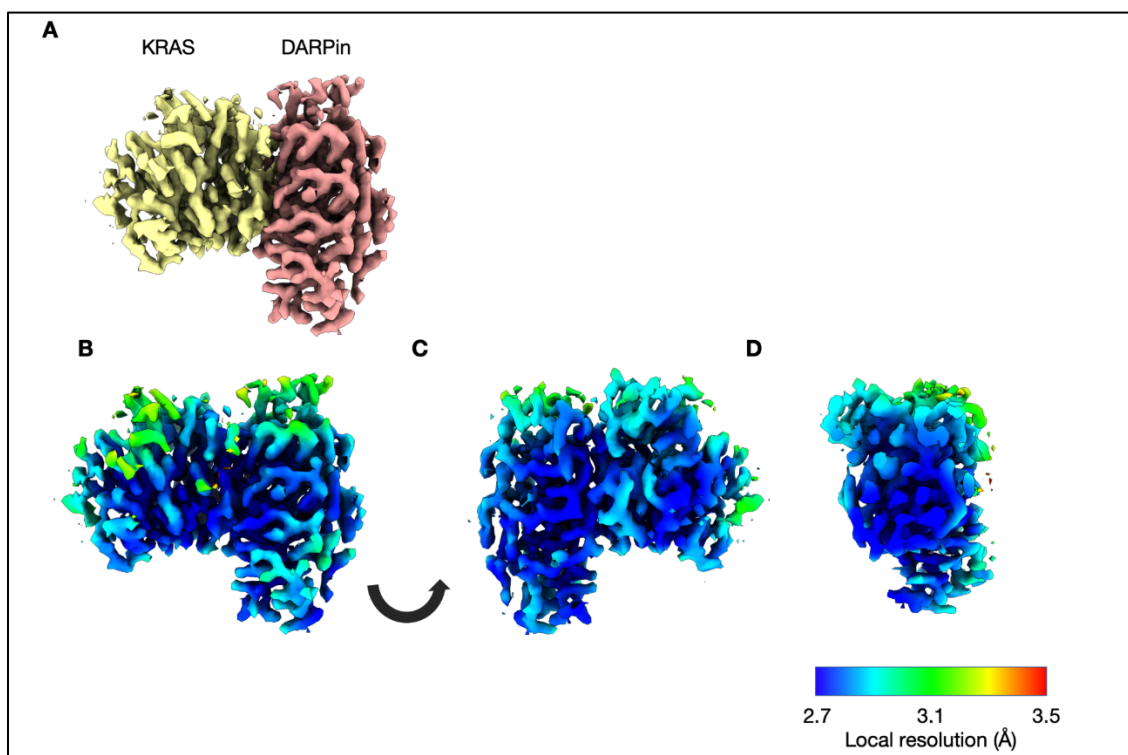

**Figure S7.** Local resolution for the focus-refined map of the KRAS G13C and DARPin. A. DARPin (salmon) and KRAS (yellow). B and C, two rotated views of the map colored by local resolution. D, cross section of the map.



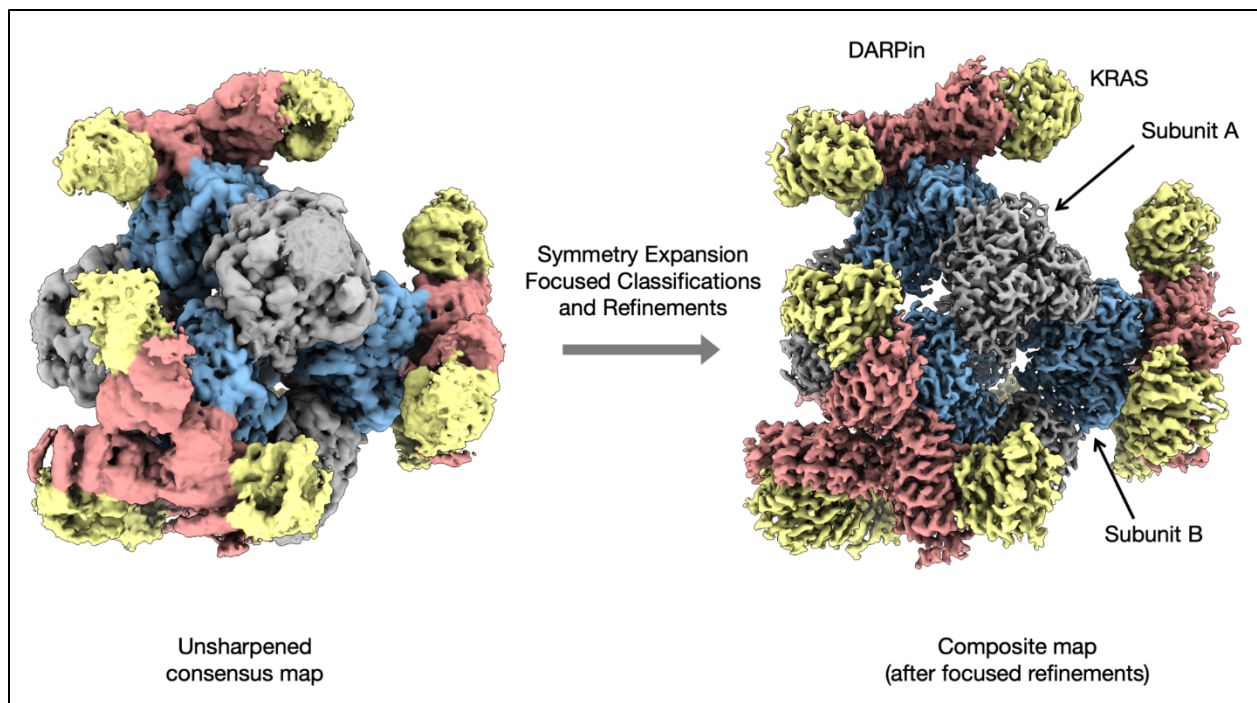

**Figure S8.** Cryo-EM densities for the imaging scaffold bound to KRAS G13C. The overall reconstruction (left) and a composite map of the focused refinements (right). After symmetry expansion (symmetry T), focused classifications and refinements were performed with a mask encompassing mainly one KRAS (yellow) and one DARPin (salmon).

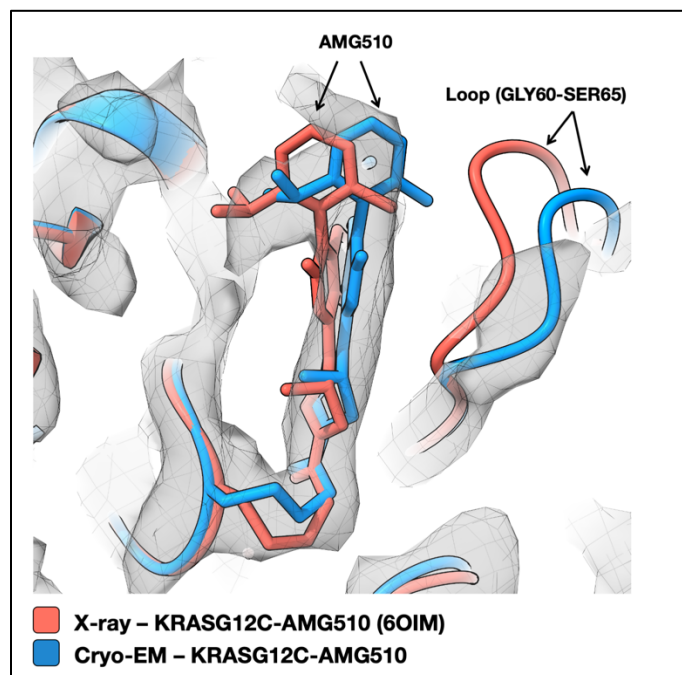

**Figure S9.** Binding position of the AMG510 drug to KRAS G12C in the cryo-EM structure reported here, compared to an x-ray crystal structure of the same complex. The cryo-EM density is shown with the refined cryo-EM model in blue. An earlier, high resolution x-ray crystal structure (pdb 6oim) is shown in salmon. [The comparison is shown after overlapping the protein backbone structures from the two coordinate sets.] The Q-score (i.e. agreement between atomic model and density map) for the terminal part of the drug molecule refined in the cryo-EM map is 0.59. For comparison, the Q-score for the drug molecule in the X-ray position compared to the cryo-EM map is considerably lower, 0.45. The refined conformation for the cryo-EM model is a better fit compared to the conformation see in the X-ray crystal structure.

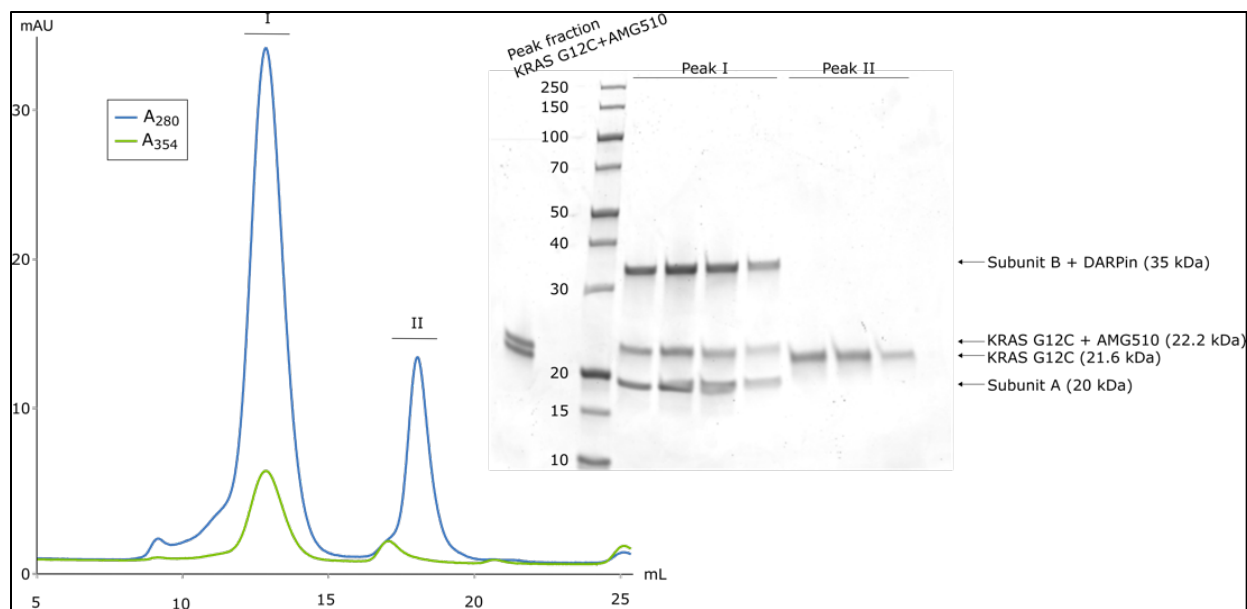

**Figure S10.** Imaging scaffold binding to KRAS G12C-AMG510. AMG510 shows maximum absorption at  $\lambda_{\text{max}}=354$  nm, allowing for validation of complex formation between imaging scaffold and AMG510-bound KRAS. Covalent attachment of AMG510 to KRAS G12C increases the molecular weight by 560 Da which can be resolved on SDS-PAGE (inset). The SEC profile shows preferential binding of AMG510-bound KRAS G12C over inhibitor-free KRAS G12C to the imaging scaffold.

GFP (EMDB:29178)

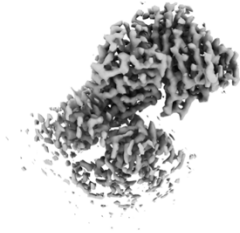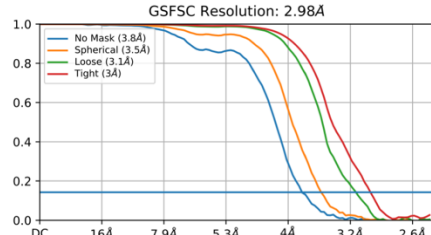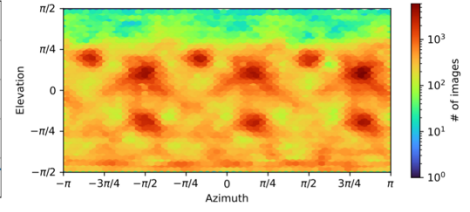

KRAS G13C (EMDB:29720)

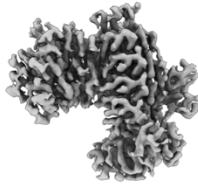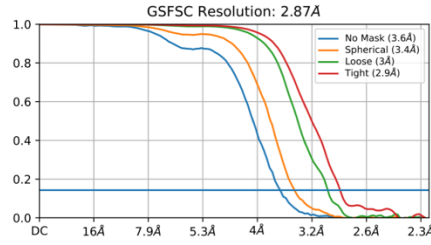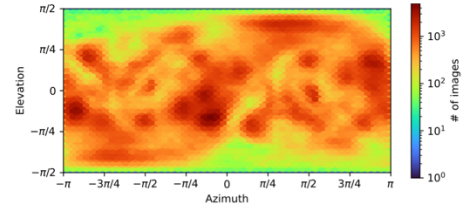

KRAS G12V (EMDB:29719)

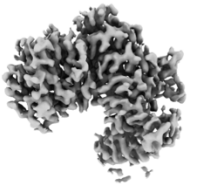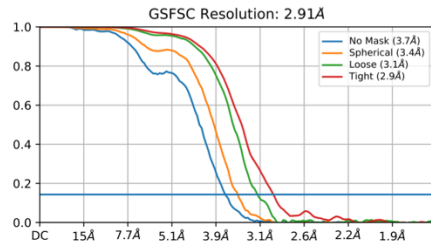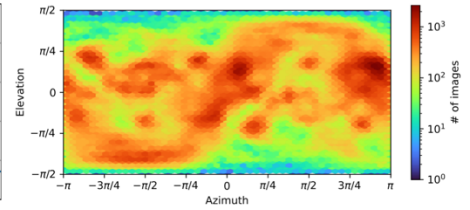

Scaffold cage core (EMDB:29700)

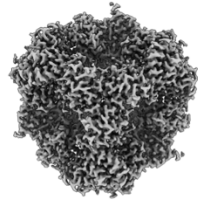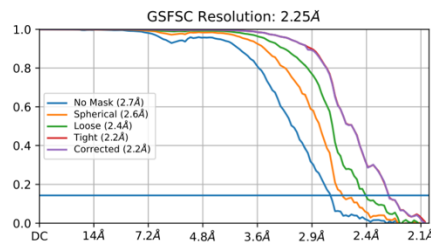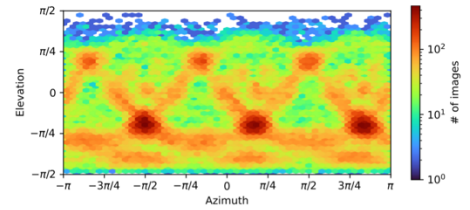

KRAS G12C (EMDB:29713)

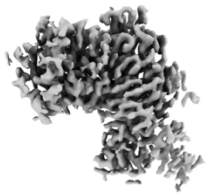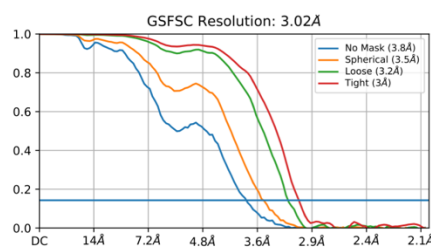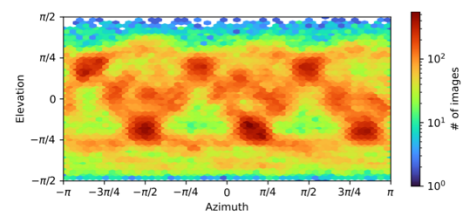

KRAS G12C AMG 510 (EMDB:29715)

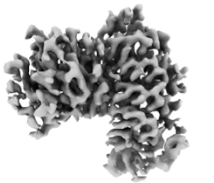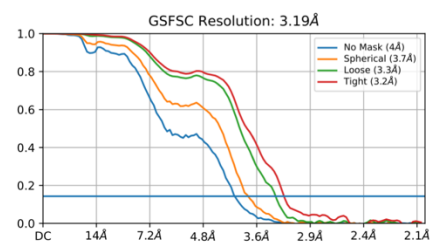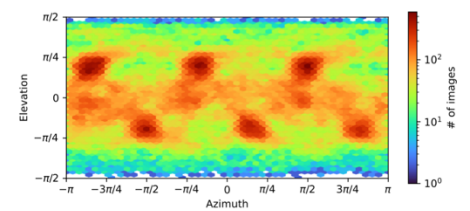



**Figure S11.** Cryo-EM maps summary. Cryo-EM maps reported in this manuscript with corresponding plots reporting the resolutions via gold standard FSC at a cutoff of 0.143 and the angular distribution of particles. The corrected FSC from EMDB:29700 is the FSC curve calculated using the tight mask with correction by noise substitution, provided when using the Homogeneous Refinement tool in cryoSPARC. Particle orientation density plots are shown in the right column.

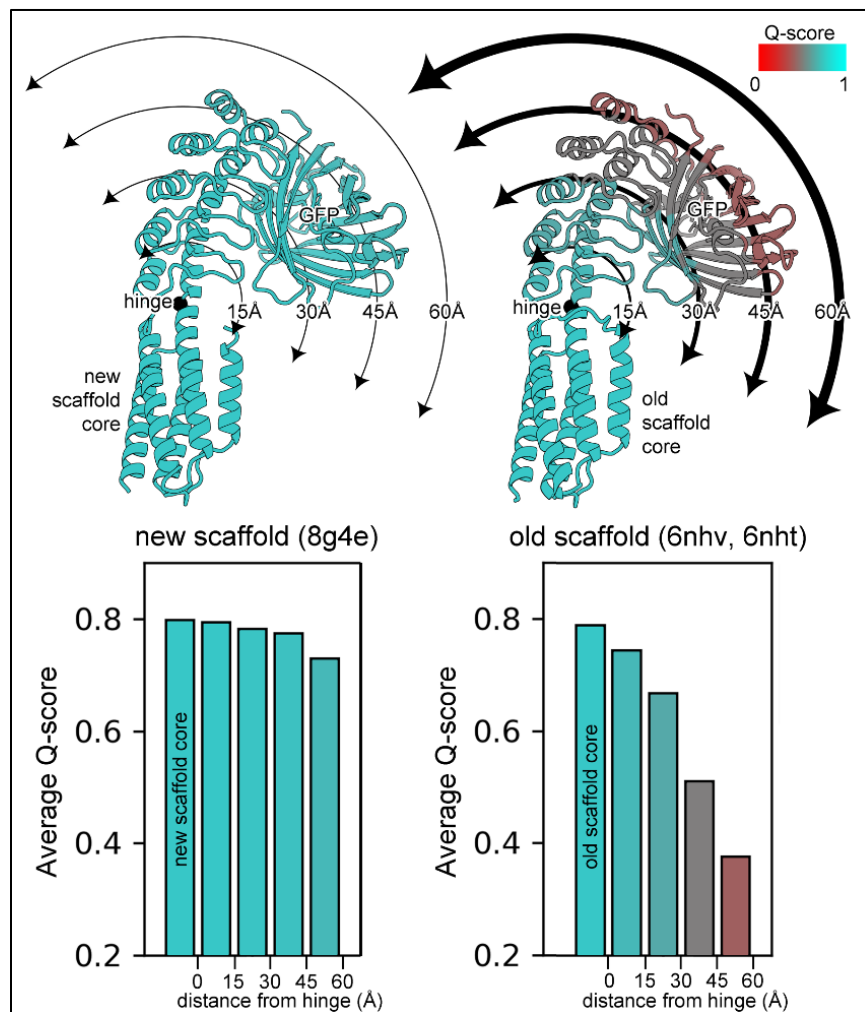

**Figure S12.** Improvements in Q-score values (i.e. correlation between atomic model and density map) are observed for the new rigidified imaging scaffolds (left) when compared with the old imaging scaffolds (right). The old scaffold exhibits a distribution of Q-scores that increases dramatically as a function of distance from the hinge point. The new scaffold largely eliminates this dependence, showing that elimination of the hinge motion is largely responsible for the improved quality of the resulting density map.

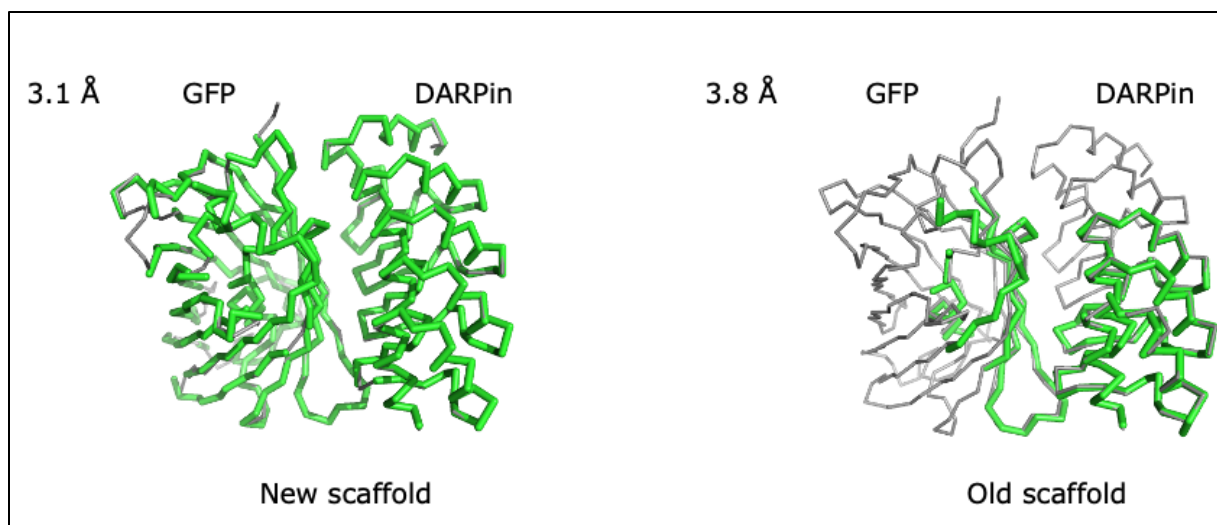

**Figure S13.** Comparison of automatic atomic model-building trials using density maps from the present scaffold vs a prior scaffold prior to engineering for rigidification. For the new scaffold, 95% of the GFP scaffold could be correctly built automatically, compared to 28% for the map obtained from the prior scaffold. The models automatically built by the program ModelAngelo are shown in green, overlaid with the final structure in gray.

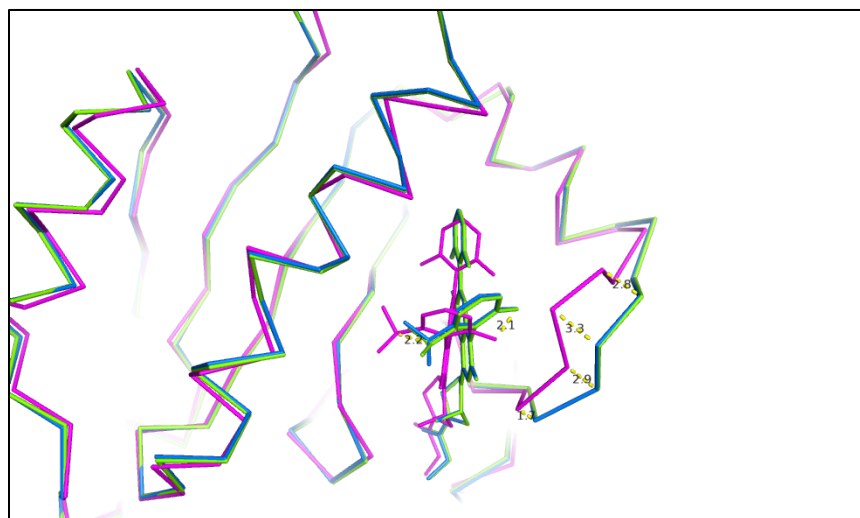

**Figure S14.** Comparison of models at the drug binding site after refinement against independent half-maps – i.e. maps obtained by 3-D reconstructions from independent sets of cryo-EM projection images. Model refined with half map A (green), half map B (marine), and the crystal structure 6oim (magenta). The coordinate differences between the two half map-refined models are approximately 1/10 the magnitude of the differences between the crystal structure (6oim) and the scaffolded cryo-EM structure (8g47).

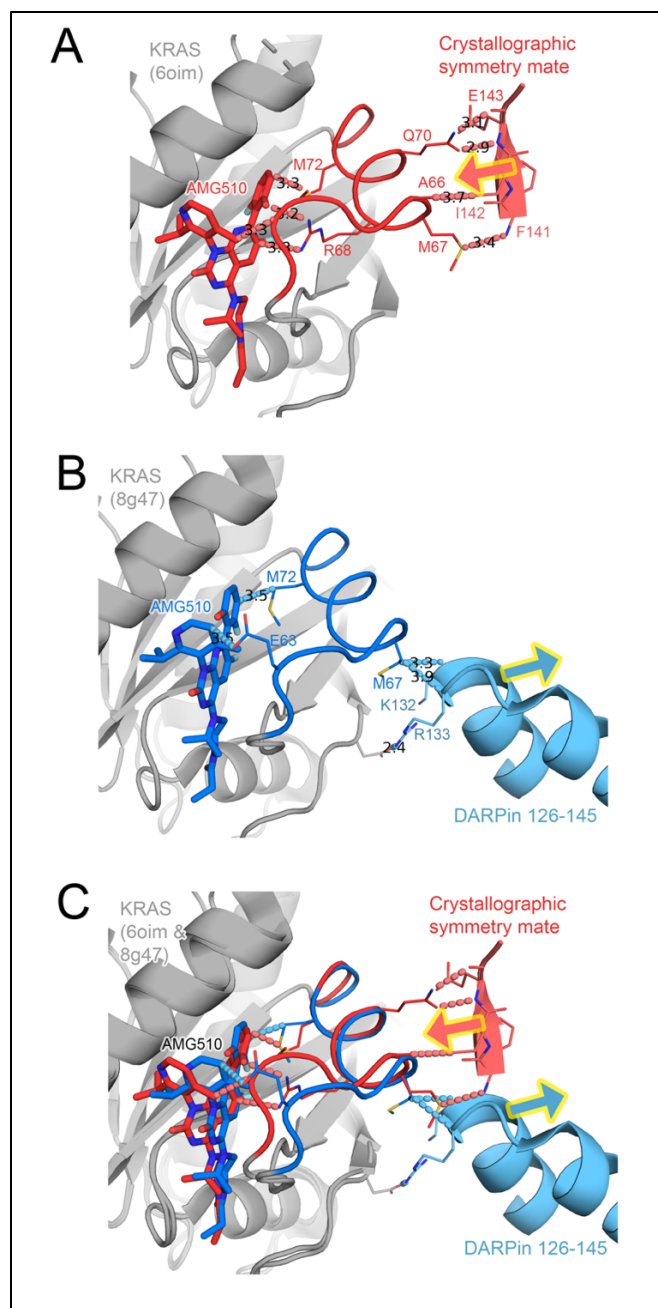

**Figure S15.** Potential influence of protein packing forces on the conformation of the AMG510 drug molecule and the neighboring binding pocket on KRAS. (A) Crystal structure of KRAS-AMG510 (6oim). Gray colors indicate residues structurally conserved with the new scaffolded cryo-EM KRAS structure (8g47). Red indicates structurally variable residues. Pink indicates a crystallographically related symmetry copy of the KRAS molecule. The neighboring molecule impinges on a helix (red) that contacts AMG510. (B) Scaffolded cryo-EM structure of KRAS-AMG510 (8g47). Residues that differ in structure from 6oim are shown in deep blue color. Light blue indicates a segment of DARPin used to display KRAS. (C) Superposition with arrows showing the different angles at which packing forces influence the AMG510 binding site in the two structures.

A

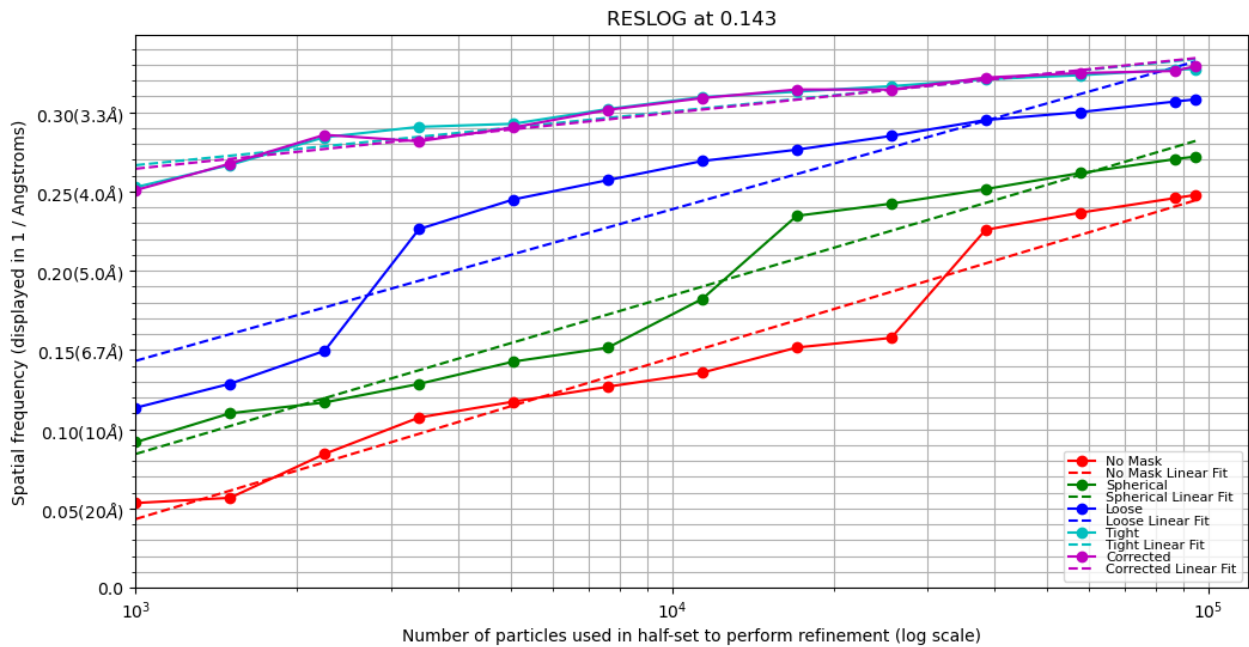

B

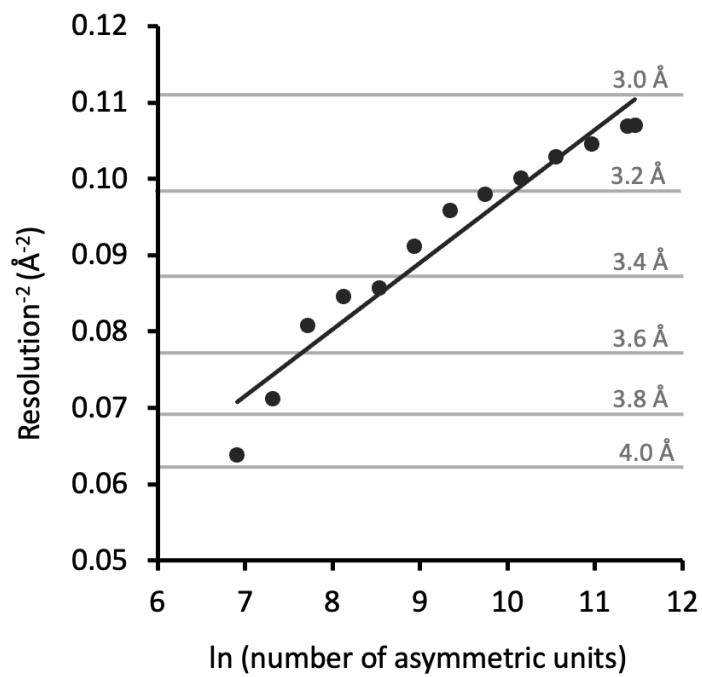



C

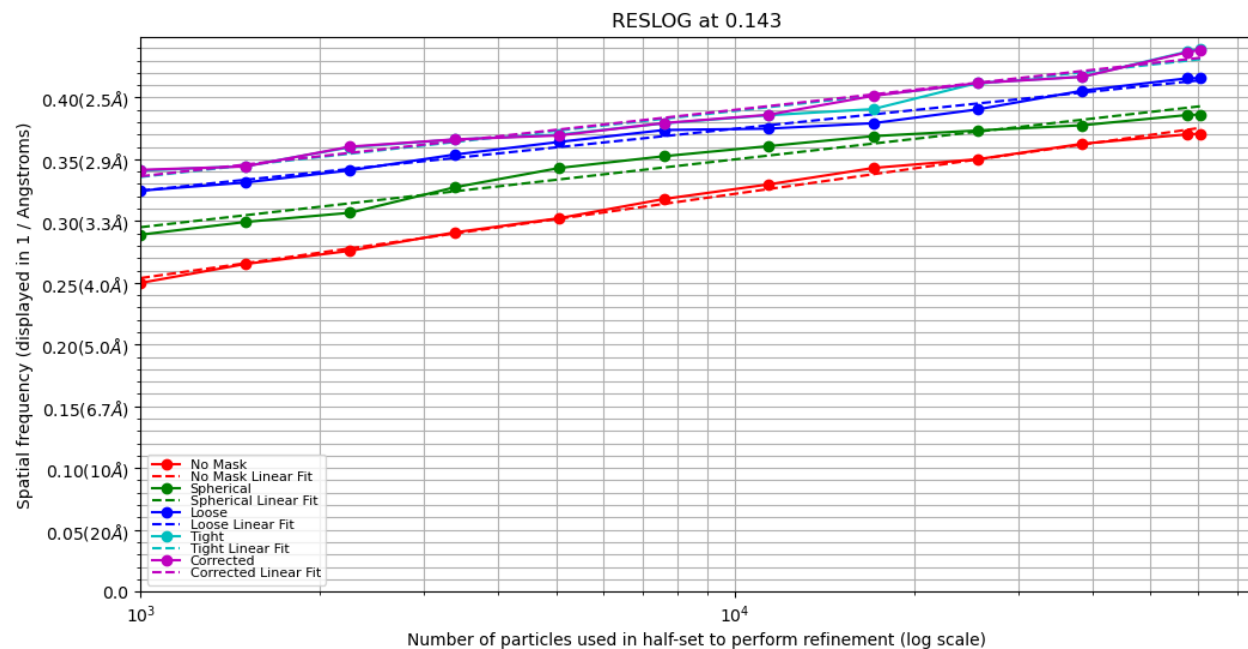

D

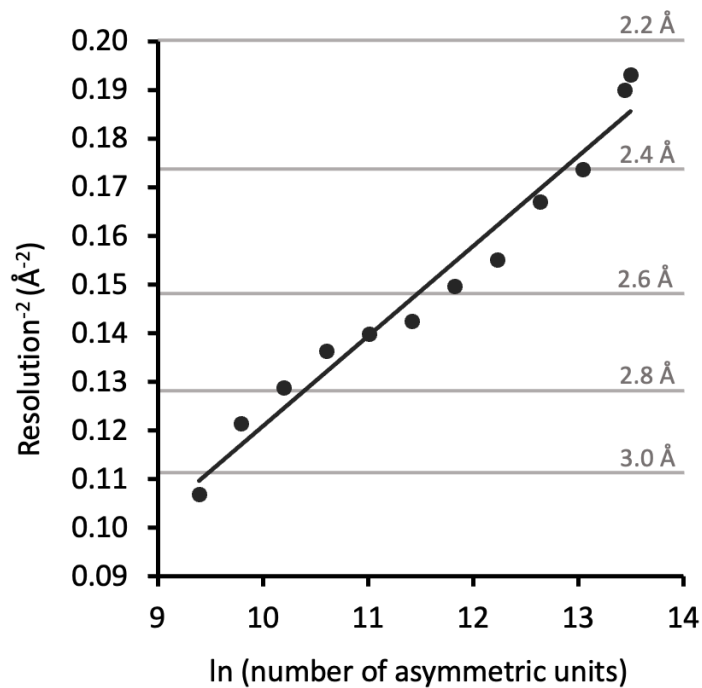

**Figure S16.** Plots of dependence of estimated resolution on number of particles based on the ResLog program (1) calculated using (a, b) the particles used for the reconstructions of KRAS G12C (C1 symmetry, emdb 29713) and (c, d) the particles used for the reconstruction of the core of the imaging scaffold with KRAS G12C (T symmetry, emdb 29700).

## Supplementary text:

### Recent cryo-EM scaffolding results:

In concurrent developments using antibody/nanobody approaches, the resolutions reported have been better for larger cargo proteins – e.g. 2.49 Å for a ~200 kDa receptor complex (2); 2.8 Å for a 64 kDa protein (3), 3.03 Å for a 58 kDa protein (4); ~3.2 Å for a 52 kDa protein (5), 3.47 Å and 3.78 Å for ~50 kDa proteins using NabFabs (6). For proteins smaller than 50 kDa, the finest resolution so far are 3.0–4.0 Å for a 11 kDa KIX domain fused to apoferritin (7) and roughly 3.2 Å for a 23 kDa protein bound to a scaffold ensemble (8). An overall resolution of 3.2 Å was reported for the overall complex between the scaffold and KDELR; a resolution range of 3.0 to 3.5 Å was estimated for the just the KDELR protein. These are summarized in Table S3.

### Protein sequences

RCG-1, cage protein T33-51, Subunit A:

MRITTKVGDKGSTRLFGGEEVWKDDPIIEANGTLDELTSFIGEAKHYVDEEMKGILEEIQ  
NDIYKIMGEIGSKGKIEGISEERIKWLAGLIERYSEMVNKLSFVLPGGTLES AKLDVCRTI  
ARRAERKVATVLRREFGIGTLAAIYLALLSRLFLARVIEIEKNKLKEVRSHHHHHH

RCG-5, Subunit B, which binds GFP:

MFTRRGDQGETDLANRARVGKDSPVVEVQGTIDELNSFIGYALVLSRWDDIRNDFRIQ  
NDFVLGEDVSTGGKGRVTMDMIYLIKRSVEMKAEIGKIELFVVPGGSVESASLHMA  
RAVSRRLERRIKAASEL TEINANVLLYANMLSNILFMHALISNKRKEELDKKLLEAARAG  
DKYAVDALLAKGADVNAADDVGV TPLHLAAQRGHLEIVEVLLKRGWDINAADLWGQ  
TPLHLAATAGHLEIV ELLWYGADVNARDNIGHTPLHLAAWAGHLEIVEVLLKYGADV  
NAQDKFGKTPFDL AIDNGNEDIAEVLQKAA

RCG-8, Subunit B, which binds GFP:

MFTRRGDQGETDLANRARVGKDSPVVEVQGTIDELNSFIGYALVLSRWDDIRNDFRIQ  
NDFVLGEDVSTGGKGRVTMDMIYLIKRSVEMKAEIGKIELFVVPGGSVESASLHMA  
RAVSRRLERRIKAASEL TEINANVLLYANMLSNILFMHALISNKRKEELDKKLLEAARAG  
YDDKVAWLLALGADVNAADDVGV TPLHLAAQRGHLEIVEVLLKRGADINAADLWGQ  
TPLHLAATAGHLEIVEKLLRCGADV NARDNIGHTPLHLAAWAGHLEIVEVLLKYGADV  
NAQDKFGKTPFDL AIDNGNEDIAEVLQKAA

RCG-10, Subunit B, which binds GFP:

MFTRRGDQGETDLANRARVGKDSPVVEVQGTIDELNSFIGYALVLSRWDDIRNDFRIQ  
NDFVLGEDVSTGGKGRVTMDMIYLIKRSVEMKAEIGKIELFVVPGGSVESASLHMA  
RAVSRRLERRIKAASEL TEINANVLLYANMLSNILFMHALISNKRKEELDKKLLEAARAG  
YDDQVAALLAKGADVNAADDVGV TPLHLAAQRGHLEIVEVLLKRGADINAADLWGQT  
PLHLAATAGHLEIV ELLRWGADVNARDNIGHTPLHLAAWAGHLEIVEVLLKYGADVN  
AQDKFGKTPFDL AIDNGNEDIAEVLQKAA

RCG-13, Subunit B, which binds GFP:

MFTRRGDQGETDLANRARVGKDSPVVEVQGTIDELNSFIGYALVLSRWDDIRNDLFRIQ  
NDLFLGEDVSTGGKGRTVTMDMIYLIKRSVEMKAEIGKIELFVVPGGSVESASLHMA  
RAVSRRLERRIKAASELTEINANVLLYANMLSNILFMHALISNKRKDELDDKKLLEAARA  
GIDDAVAALLAKGADVNAADDVGVTPHLAAQRGHLEIVKVLLLRGADINAADLWQG  
TPLHLAATAGHLEIVEVLLRCGADVNAARDNIGHTPLHLAAWAGHLEIVEVLLKYGADV  
NAQDKFGKTPFDLAIIDNGNEDIAEVLQKAA

RCG-14, Subunit B, which binds GFP:

MFTRRGDQGETDLANRARVGKDSPVVEVQGTIDELNSFIGYALVLSRWDDIRNDLFRIQ  
NDLFLGEDVSTGGKGRTVTMDMIYLIKRSVEMKAEIGKIELFVVPGGSVESASLHMA  
RAVSRRLERRIKAASELTEINANVLLYANMLSNILFMHALISNKRDERNKKLLEAARA  
GIDDAVDWLLALGADVNAADDVGVTPHLAAQRGHLEIVKVLLSRGADINAADLWQG  
TPLHLAATAGHLEIVEVLLRCGADVNAARDNIGHTPLHLAAWAGHLEIVEVLLKYGADV  
NAQDKFGKTPFDLAIIDNGNEDIAEVLQKAA

RCG-33, Subunit B, which binds KRAS:

MFTRRGDQGETDLANRARVGKDSPVVEVQGTIDELNSFIGYALVLSRWDDIRNDLFRIQ  
NDLFLGEDVSTGGKGRTVTMDMIYLIKRSVEMKAEIGKIELFVVPGGSVESASLHMA  
RAVSRRLERRIKAASELTEINANVLLYANMLSNILFMHALISNKRKEELDDKKLLEAARAG  
QDDEVAALLAKGADVNAHDTFGFTPLHLAALYGHLEIVEVLLKRGADINADDSYGRTP  
LHLAAMRGHLEIVEVLLRWGADVNAADEEGRTPLHLAAKRGHLEIVEVLLKNGADV  
NAQDKFGKTAFDISIDNGNEDLAEILQKL

Super folder GFP V206A:

MSKGEELFTGVVPIVVELDGDVNGHKFSVRGEGEGDATNGKLTCLKFICTTGKLPVPWPT  
LVTTLTLYGVQCFSRYPDHMKRHDFFKSAMPEGYVQERTISFKDDGTYKTRAEVKFEGD  
TLVNRIELKGIDFKEDGNILGHKLEYNFNSHNVYITADKQKNGIKANFKIRHNVEDGVSQ  
LADHYQQNTPIGDGPVLLPDNHYLSTQSALS KDPNEKRDHMLLEFVTAAGITHHHHH  
H

KRAS-G13C:

GSMTEYKLVVVGAGCVGKSALTIQLIQNHVDEYDPTIEDSYRKQVVIDGETSLLDILDT  
AGQEEYSAMRDQYMRTGEGFLVFAINNTKSFEDIHHYREQIKRVKDSSEVPMVLVGN  
KSDLPSRTVDTKQAQDLARSYGIPFIETSAKTRQGVDDAFYTLVREIRKHKEK

KRAS-G12V:

GSHMTEYKLVVVGAVGVGKSALTIQLIQNHVDEYDPTIEDSYRKQVVIDGETCLLDIL  
DTAGQEEYSAMRDQYMRTGEGFLCVFAINNTKSFEDIHHYREQIKRVKDSSEVPMVLV  
GNKCDLPSRTVDTKQAQDLARSYGIPFIETSAKTRQGVDDAFYTLVREIRKH

KRAS-G12C:

MGSSHHHHHHSSGENLYFQSMTEYKLVVVGACGVGKSALTIQLIQNHVDEYDPTIEDS  
YRKQVVIDGETCLLDILDTAGQEEYSAMRDQYMRTGEGFLCVFAINNTKSFEDIHHYRE  
QIKRVKDSSEVPMVLVGNKCDLPSRTVDTKQAQDLARSYGIPFIETSAKTRQGVDDAFY  
TLVREIRKHKEK

**Table S1.** Cryo-EM data collection, image analysis, modeling, refinement, and validation statistics

| Dataset                                         | GFP +<br>imaging scaffold<br>(RCG-1, RCG-10) | KRAS-G13C +<br>imaging scaffold<br>(RCG-1, RCG-33) | KRAS-G12V +<br>imaging scaffold<br>(RCG-1, RCG-33) | KRAS-G12C +<br>imaging scaffold<br>(RCG-1, RCG-33) | KRAS-G12C +<br>imaging scaffold<br>(RCG-1, RCG-33) | KRAS-G12C-<br>AMG510 +<br>imaging scaffold<br>(RCG-1, RCG-33) |
|-------------------------------------------------|----------------------------------------------|----------------------------------------------------|----------------------------------------------------|----------------------------------------------------|----------------------------------------------------|---------------------------------------------------------------|
| <b>Map refinement</b>                           | Focused on GFP +<br>DARPin domain            | Focused on KRAS-<br>G13C + DARPin<br>domain        | Focused on KRAS-<br>G12V + DARPin<br>domain        | Global                                             | Focused on KRAS-<br>G12C + DARPin<br>domain        | Focused on KRAS-<br>G12C-AMG510 +<br>DARPin domain            |
| <b>Data collection and processing</b>           |                                              |                                                    |                                                    |                                                    |                                                    |                                                               |
| Microscope                                      | Titan Krios                                  | Titan Krios                                        | Titan Krios                                        | Titan Krios                                        | Titan Krios                                        | Titan Krios                                                   |
| Voltage (keV)                                   | 300                                          | 300                                                | 300                                                | 300                                                | 300                                                | 300                                                           |
| Detector                                        | K3 Summit                                    | K3 Summit                                          | K3 Summit                                          | Falcon4                                            | Falcon4                                            | Falcon4                                                       |
| Nominal magnification                           | 81,000                                       | 81,000                                             | 105,000                                            | 155,000                                            | 155,000                                            | 155,000                                                       |
| Data Acquisition Software                       | SerialEM                                     | SerialEM                                           | SerialEM                                           | EPU                                                | EPU                                                | EPU                                                           |
| Electron dose (e <sup>-</sup> /Å <sup>2</sup> ) | 33                                           | 40                                                 | 48                                                 | 40                                                 | 40                                                 | 40                                                            |
| Pixel Size (Å)                                  | 1.1                                          | 1.1                                                | 0.856                                              | 0.5                                                | 0.5                                                | 0.5                                                           |
| Defocus range (µm)                              | -1.00 to -2.20                               | -1.00 to -2.20                                     | -1.00 to -2.20                                     | -1.00 to -2.25                                     | -1.00 to -2.25                                     | -1.00 to -2.25                                                |
| Number of movies (#)                            | 3,575                                        | 2,000                                              | 3,616                                              | 7,312                                              | 7,312                                              | 2,072                                                         |
| Number of particles                             | 1,221,977                                    | 1,653,856                                          | 685,177                                            | 121,441                                            | 189,266                                            | 171,436                                                       |
| Symmetry imposed                                | C1                                           | C1                                                 | C1                                                 | T                                                  | C1                                                 | C1                                                            |
| Resolution (Å)                                  | 3.0                                          | 2.9                                                | 2.9                                                | 2.2                                                | 3.0                                                | 3.2                                                           |
| FSC threshold                                   | 0.143                                        | 0.143                                              | 0.143                                              | 0.143                                              | 0.143                                              | 0.143                                                         |
| <b>Refinement</b>                               |                                              |                                                    |                                                    |                                                    |                                                    |                                                               |
| Initial model used (PDB code)                   | <i>de novo</i>                               | <i>de novo</i>                                     | KRAS-G13C                                          | 5cy5                                               | 5o2s                                               | 6oim                                                          |
| Non-hydrogen atoms                              | 3075                                         | 2504                                               | 2529                                               | 2244                                               | 2498                                               | 2575                                                          |
| Protein residues                                | 396                                          | 320                                                | 323                                                | 285                                                | 323                                                | 325                                                           |
| Residue range modelled                          | GFP (1-231) +<br>RCG-10 (155-322)            | KRAS-G13C (1-168)<br>+ RCG-33 (169-320)            | KRAS-G12V (1-165)<br>+ RCG-33 (163-320)            | RCG-1 (24-166) +<br>RCG-33 (23-171)                | KRAS-G12C (1-165)<br>+ RCG-33 (163-320)            | KRAS-G12C-<br>AMG510 (1-168) +<br>RCG-33 (163-319)            |
| R.M.S. deviations                               |                                              |                                                    |                                                    |                                                    |                                                    |                                                               |
| Bond lengths (Å)                                | 0.002                                        | 0.002                                              | 0.002                                              | 0.002                                              | 0.003                                              | 0.002                                                         |
| Bond angles (°)                                 | 0.45                                         | 0.45                                               | 0.44                                               | 0.36                                               | 0.46                                               | 0.44                                                          |
| <b>Validation</b>                               |                                              |                                                    |                                                    |                                                    |                                                    |                                                               |
| MolProbity score                                | 1.72                                         | 1.47                                               | 1.37                                               | 1.14                                               | 1.49                                               | 1.45                                                          |
| Clashscore                                      | 7.3                                          | 5.4                                                | 3.7                                                | 3.5                                                | 8.0                                                | 8.3                                                           |
| Poor rotamers (%)                               | 2.2                                          | 1.5                                                | 1.9                                                | 0.0                                                | 1.0                                                | 0.4                                                           |
| Ramachandran (%)                                |                                              |                                                    |                                                    |                                                    |                                                    |                                                               |
| Favored                                         | 97.7                                         | 97.8                                               | 98.8                                               | 99.3                                               | 97.8                                               | 99.1                                                          |
| Allowed                                         | 2.3                                          | 2.2                                                | 1.2                                                | 0.7                                                | 2.2                                                | 0.9                                                           |
| Disallowed                                      | 0.0                                          | 0.0                                                | 0.0                                                | 0.0                                                | 0.0                                                | 0.0                                                           |
| Fit to map (CC <sub>mask</sub> )                | 0.8176                                       | 0.7961                                             | 0.8436                                             | 0.8216                                             | 0.7607                                             | 0.7157                                                        |
| <b>Accession codes</b>                          |                                              |                                                    |                                                    |                                                    |                                                    |                                                               |
| EMDB (maps)                                     | 29718                                        | 29720                                              | 29719                                              | 29700                                              | 29713                                              | 29715                                                         |
| PDB (model)                                     | 8G4E                                         | 8G4H                                               | 8G4F                                               | 8G3K                                               | 8G42                                               | 8G47                                                          |



**Table S2.** Rmsd alpha-carbons (Å) values between X-ray structures and the cryo-EM maps.

| Target (pdb ID) | Moving                | RMSD alpha-carbons (Å) | Number of atom pairs superimposed |
|-----------------|-----------------------|------------------------|-----------------------------------|
| 6oim            | 8G42-kras-g12c-gdp    | 1.08                   | 161                               |
| 6oim            | 8G47-kras-g12c-AMG510 | 0.73                   | 161                               |
| 6oim            | 8G4F-kras-g12v-gdp    | 0.99                   | 161                               |
| 6oim            | 8G4H-kras-g13c-gdp    | 1.07                   | 161                               |
| 6b9c            | 8G4E-gfp.pdb          | 0.59                   | 202                               |

**Table S3.** Comparison of size and resolution for contemporary Cryo-EM protein fiducial/scaffolds including their binders and targets.

| Citation                 | Total scaffold size(s) (kDa) | Modular binder - size (kDa) | Protein Target - size(s) (kDa)                         | Reported Resolution (Å) |
|--------------------------|------------------------------|-----------------------------|--------------------------------------------------------|-------------------------|
| Liu, Y. et al. 2018      | 591.5                        | DARPin - 16.8               | GFP - 26                                               | 3.8                     |
| Uchański, T. et al. 2021 | 56, 100                      | Nanobody - 14               | WbaP-B - 114<br>GABAaR - 288.5 pentamer (57.7 monomer) | ~5<br>2.49              |
| Block, J. S. et al. 2021 | 76.7                         | Nanobody - 13.3             | VcNorM - 49.4<br>ScaDMT - 49.3                         | 3.47<br>3.78            |
| Wu and Rappaport 2021    | 120                          | Nanobody - 15               | SARS-CoV2 spike RBD - 22<br>KDEL receptor - 23         | 3.6<br>3.2              |
| Zhang, K. et al. 2022    | 291.7                        | N/A                         | KIX - 11.4                                             | 3-4                     |
| This work                | 664.5                        | DARPin - 17.2               | KRAS - 19.4<br>GFP - 26                                | 2.9<br>3.1              |

## References:

1. S. M. Stagg, A. J. Noble, M. Spilman, M. S. Chapman, ResLog plots as an empirical metric of the quality of cryo-EM reconstructions. *Journal of Structural Biology* **185**, 418–426 (2014).
2. T. Uchański, *et al.*, Megabodies expand the nanobody toolkit for protein structure determination by single-particle cryo-EM. *Nat Methods* **18**, 60–68 (2021).
3. M. A. Herzik, M. Wu, G. C. Lander, High-resolution structure determination of sub-100 kDa complexes using conventional cryo-EM. *Nature Communications* **10**, 1032 (2019).
4. R. J. Cater, *et al.*, Structural basis of omega-3 fatty acid transport across the blood–brain barrier. *Nature* **595**, 315–319 (2021).
5. X. Fan, *et al.*, Single particle cryo-EM reconstruction of 52 kDa streptavidin at 3.2 Angstrom resolution. *Nat Commun* **10**, 2386 (2019).
6. J. S. Bloch, *et al.*, Development of a universal nanobody-binding Fab module for fiducial-assisted cryo-EM studies of membrane proteins. *Proceedings of the National Academy of Sciences* **118**, e2115435118 (2021).
7. K. Zhang, *et al.*, Cryo-EM, Protein Engineering, and Simulation Enable the Development of Peptide Therapeutics against Acute Myeloid Leukemia. *ACS Central Science* **8**, 214–222 (2022).
8. X. Wu, T. A. Rapoport, Cryo-EM structure determination of small proteins by nanobody-binding scaffolds (Legobodies). *Proceedings of the National Academy of Sciences* **118**, e2115001118 (2021).
